# Supplementary material for: High Levels of SOX5 Decrease Proliferative Capacity of Human B Cells, but Permit Plasmablast Differentiation
Source: PubMed Central journal article supplement (PMC4063782; doi:10.1371/journal.pone.0100328), 2014-06-19
Supplement: pone.0100328.s001.pdf [file pone.0100328.s001.pdf]

**A**SOX5 transcript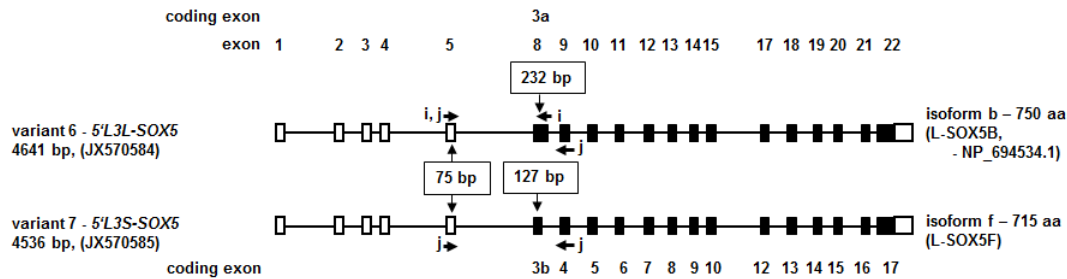**B**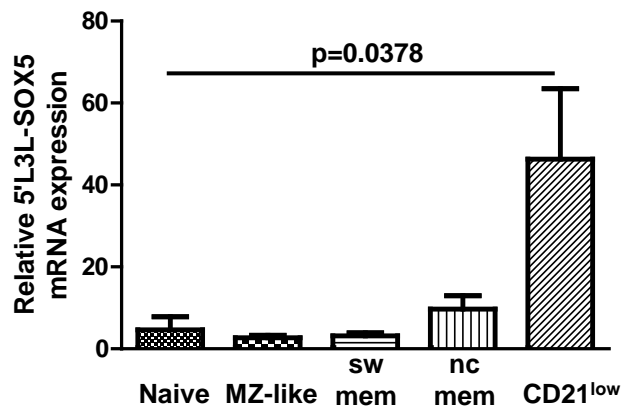**C**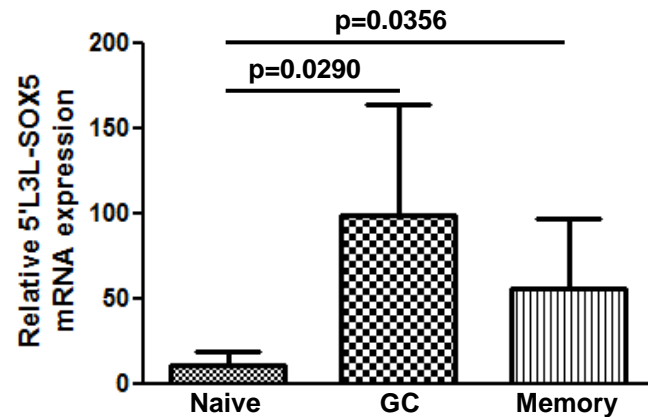**D**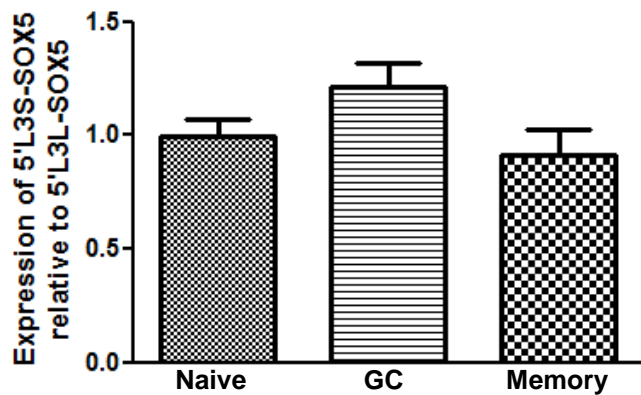**E**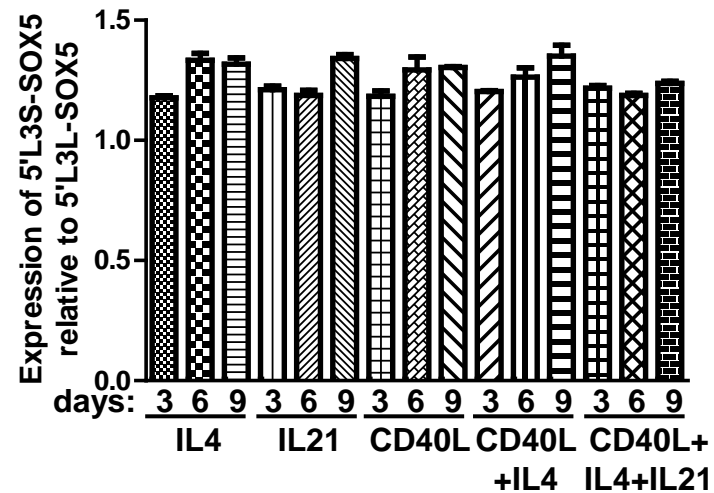

Figure S1.
