# Supplementary material for: High Levels of SOX5 Decrease Proliferative Capacity of Human B Cells, but Permit Plasmablast Differentiation
Source: PubMed Central journal article supplement (PMC4063782; doi:10.1371/journal.pone.0100328), 2014-06-19
Supplement: pone.0100328.s006.pdf [file pone.0100328.s006.pdf]

Table S1. Primer sequences used in this study.

| SOX5 PCR primer pair | Primer name                               | Primer sequence                       |
|----------------------|-------------------------------------------|---------------------------------------|
|                      | <b>PCR primers:</b>                       |                                       |
|                      | β-actin forward                           | 5'-ATC ATT GCT CCT CCT GAG CG-3'      |
|                      | β-actin reverse                           | 5'-TCA CCT CCC CTG TGT GGA CT-3'      |
|                      | CD19 forward                              | 5'-CGG GAG TGG GCC CAG AAG AAG AGG-3' |
|                      | CD19 reverse                              | 5'-CCA GGC TGG CCC CGA ATG GAG-3'     |
| a                    | SOX5-var-1 forward                        | 5'-AGC ATG CTT ACT GAC CCT GAT TTA-3' |
| a                    | SOX5-var-1 reverse                        | 5'-GGG AGT CCT ATG GCC ACA AGT CT-3'  |
| b                    | SOX5-var-5 forward                        | 5'-CAC GGG GCA GCC ACC ATC T-3'       |
| b                    | SOX5-var-5 reverse                        | 5'-CGC CCA CCT TCT TCT GCC TTC T-3'   |
| c                    | SOX5-var-3 forward                        | 5'-TTG TGC CAT AGG AGC TGT GCA T-3'   |
| c                    | SOX5-var-3 reverse                        | 5'-TTC GGC AGT TAT TGA GAC CCA GAC-3' |
| d                    | SOX5-var-2/4 forward (5'-end)             | 5'-GCG ACC TAC TGG GCT TTC CTC TTG-3' |
| d                    | SOX5-var-2/4 reverse (5'-end)             | 5'-CCG TCA CTC TCC TCT TCT TCC ACT-3' |
| e                    | SOX5-var-2/4 forward (exon-15)            | 5'-AAC CTT GGT GCT GCT GTA TCT CCT-3' |
| e                    | SOX5-var-2/4 reverse (exon-20)            | 5'-CCG TTC ATC TTT AGC CCA CAC CAT-3' |
| f                    | SOX5-exon-22 forward                      | 5'-CAA GCG TGT CTA GCA GCC C-3'       |
| f                    | SOX5-exon-22 reverse                      | 5'-TGG CTT GTC CTG CAA TAT GGT-3'     |
| g                    | SOX5-CDS forward (exon-3/4)               | 5'-GCG ACC TAC TGG GCT TTC CTC TTG-3' |
| g                    | SOX5-CDS reverse (exon-22)                | 5'-CTC TTT TTC CCT CTT TCC CCT CAT-3' |
| h                    | SOX5-exon-3/4 forward                     | 5'-GCG ACC TAC TGG GCT TTC CTC TTG-3' |
| h                    | SOX5-exon-9 reverse (coding exon-4)       | 5'-TCG CCC ACC TTC TTC TGC CTT CTG-3' |
|                      | RPLP0 forward                             | 5'-CGG GCC CGA GAA GAC CT-3'          |
|                      | RPLP0 reverse                             | 5'-TTG TAC CCG TTG ATG ATA GAA TGG-3' |
|                      | SOX6 forward                              | 5'-TGA TCC CAA TTT TTC CAC AT-3'      |
|                      | SOX6 reverse                              | 5'-CCA GCT GAG CGG CAT AGA-3'         |
|                      | SOX9 forward                              | 5'-GCG GCG GAG GAA GTC GGT GAA GA-3'  |
|                      | SOX9 reverse                              | 5'-ACG TCG GTT TTG GGG GTG GTG-3'     |
|                      | SOX13 forward                             | 5'-GCC ATA GAG AAG CTG TTG TCC-3'     |
|                      | SOX13 reverse                             | 5'-ATC TTA TGC TGC TGC TGA ATC-3'     |
|                      | GAPDH forward                             | 5'-GAA GGT GAA GGT CGG AGT C-3'       |
|                      | GAPDH reverse                             | 5'-GAA GAT GGT GAT GGG ATT TC-3'      |
| h                    | 5'L3S-SOX5 forward (exon-3/4)             | 5'-GCG ACC TAC TGG GCT TTC CTC TTG-3' |
| h                    | 5'L3S-SOX5 reverse (exon-9/coding exon-4) | 5'-TCG CCC ACC TTC TTC TGC CTT CTG-3' |
|                      | RHOB forward                              | 5'-GGC CAT CCG CAA GAA GC-3'          |
|                      | RHOB reverse                              | 5'-CGC AGG CGG TCG TAG TCC-3'         |
|                      | S100A1 forward                            | 5'-TCG GGC AAA GAG GGG GAC AAG TA-3'  |
|                      | S100A1 reverse                            | 5'-TGA GAG CAG CCA CAA GCA CCA CA-3'  |
|                      | S100B forward                             | 5'-GCC CTC ATC GAC GTT TTC CAC CAA-3' |
|                      | S100B reverse                             | 5'-AGT CAC ATT CGC CGT CTC CAT CAT-3' |
|                      |                                           |                                       |
|                      | <b>Real time qPCR primers:</b>            |                                       |
|                      | RPLP0 forward                             | 5'-CGG GCC CGA GAA GAC CT-3'          |
|                      | RPLP0 reverse                             | 5'-TTG TAC CCG TTG ATG ATA GAA TGG-3' |
| a                    | SOX5-exon-22 forward                      | 5'-CAA GCG TGT CTA GCA GCC C-3'       |
| a                    | SOX5-exon-22 reverse                      | 5'-TGG CTT GTC CTG CAA TAT GGT-3'     |
|                      | BLIMP1 forward                            | 5'-GAC TTT GCA GAA AGG CTT CAC T-3'   |
|                      | BLIMP1 reverse                            | 5'-ACA TTC TTT GGG CAG AGT TCA T-3'   |
| i                    | 5'L3L-SOX5 forward                        | 5'-AGA GAT TGG ACT GGG AGA C-3'       |
| i                    | 5'L3L-SOX5 reverse                        | 5'-CAT TGT ATT GTG CTG AGA AGT G-3'   |
|                      |                                           |                                       |
|                      |                                           |                                       |

Table S1. (continued).

| SOX5 PCR primer pair | Primer name                                          | Primer sequence                               |
|----------------------|------------------------------------------------------|-----------------------------------------------|
|                      | <b><u>CDS cloning and sequencing primers:</u></b>    |                                               |
| g                    | SOX5-CDS forward (exon-3/4)                          | 5'-GCG ACC TAC TGG GCT TTC CTC TTG-3'         |
| g                    | SOX5-CDS reverse (exon-22)                           | 5'-CTC TTT TTC CCT CTT TCC CCT CAT-3'         |
|                      | M13 forward                                          | 5'-GTA AAA CGA CGG CCA GT-3'                  |
|                      | M13 reverse                                          | 5'-GGA AAC AGC TAT GAC CAT G-3'               |
|                      | SOX5-CDS-seq forward-1                               | 5'-ACG GCG CAA GGG CAG TTT AG-3'              |
|                      | SOX5-CDS-seq reverse-1                               | 5'-GAG GTG GGT GAT GTG GGT GAT TTG-3'         |
|                      | SOX5-CDS-seq forward-2                               | 5'-AAC CTT GGT GCT GCT GTA TCT CCT-3'         |
|                      | SOX5-CDS-seq reverse-2                               | 5'-CCG TTC ATC TTT AGC CCA CAC CAT-3'         |
|                      | SOX5-CDS-seq forward-3                               | 5'-GGG AAG GTG GCT GTT GTG AAT AGT-3'         |
|                      | SOX5-CDS-seq reverse-3                               | 5'-AGG TGC TGC TTG CTG AGA CG-3'              |
|                      | SOX5-CDS-seq forward-4                               | 5'-TGT GGG CTA AAG ATG AAC GGA GAA-3'         |
|                      | SOX5-CDS-seq reverse-4                               | 5'-CTG GGC TGC TAG ACA CGC TTG AG-3'          |
|                      | SOX5-CDS-seq forward-5                               | 5'-TGG GCA ACA AGC ACA GAT-3'                 |
|                      | SOX5-CDS-seq reverse-5                               | 5'-AAA AAG TTG ACG GGT AAG AC-3'              |
|                      | <b><u>Primers for fragment analysis</u></b>          |                                               |
| j                    | 5'-FAM-SOX5-5'L forward                              | 5'-5AG AGA TTG GAC TGG GAG AC-3'              |
| j                    | 5'-FAM-SOX5 reverse (coding exon-4)                  | 5'-5TC GCC CAC CTT CTT CTG CCT TCT G-3'       |
|                      | <b><u>Primers for SOX5-GFP fusion construct:</u></b> |                                               |
|                      | EcoRI-SOX5 forward                                   | 5'-TGC CAG AAT TCC ACT GCA CTG GGT AGG AA-3'  |
|                      | BamHI-SOX5 reverse                                   | 5'-ACC GGT GGA TCC CAG TTG GCT TGT CCT GCA-3' |
